# Supplementary material for: Syntheses and photophysical properties of type-II CdSe/ZnTe/ZnS (core/shell/shell) quantum dots
Source: Royal Society of Chemistry journal article supplement (doi:10.1039/b503681j), 2005-01-01
Supplement: b503681j.pdf [file b503681j.pdf]

## Electronic Supplementary Information (ESI)

### Syntheses and Photophysical Properties of Type-II CdSe/ZnTe/ZnS (core/shell/shell) Quantum Dots

Chiu-Ting Cheng,<sup>a</sup> Chun-Yen Chen,<sup>a</sup> Chih-Wei Lai,<sup>a</sup> Wei-Hsin Liu,<sup>a</sup> Shih-Chieh Pu,<sup>a</sup> Pi-Tai Chou,<sup>\*a</sup> Yi-Hsuan Chou<sup>b</sup> and Hsin-Tien Chiu<sup>\*b</sup>

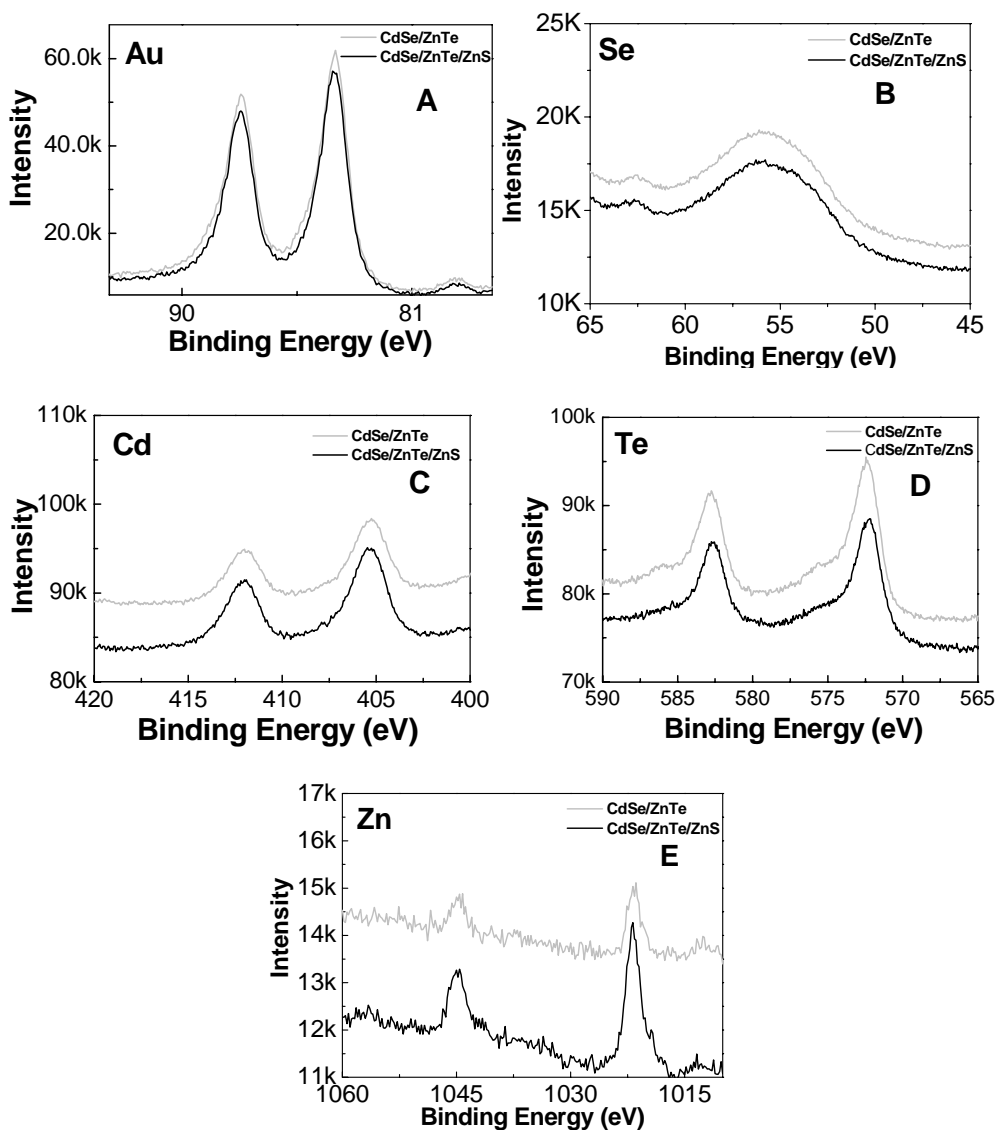

Fig. S-1 B-E. The XPS spectra of CdSe/ZnTe (core-shell, grey line) and CdSe/ZnTe/ZnS (core-shell-shell, solid line). Note that the surface of samples was deposited by Au in order to increase the conductivity. The signals of Au (display A) also serve as a standard to calibrate the peak positions of other elements.
